# Supplementary material for: Synthesis of magnetic biomass carbon-based Bi2O3 photocatalyst and mechanism insight by a facile microwave and deposition method
Source: Royal Society of Chemistry journal article supplement (doi:10.1039/c8nj04973d), 2018-12-26
Supplement: c8nj04973d1.pdf [file c8nj04973d1.pdf]

## Supporting Information

### Facile microwave and deposition method synthesis of magnetic biomass carbon based Bi<sub>2</sub>O<sub>3</sub> photocatalyst and mechanism insight

Wei Ma<sup>a\*</sup>, Na Wang<sup>a</sup>, Yao Lu<sup>ab</sup>, Ziyang Lu<sup>c</sup>, Xu Tang<sup>d</sup>, Songtian Li<sup>a\*</sup>

- a. School of Chemistry and Environmental Engineering, Pingdingshan University,  
Pingdingshan 467099, PR China
- b. College of Chemistry and Molecular Engineering, Zhengzhou University,  
Zhengzhou, 450000, PR China
- c. School of the Environment and Safety Engineering, Jiangsu University,  
Jiangsu, Zhenjiang, 212013, PR China
- d. Institute for Advanced Materials, School of Materials Science, Jiangsu  
University, Zhenjiang 212013, P.R. China

\*Corresponding authors:

Tel: 86-375-2657731 Fax: 86-375-265773

E-mail address: maweihen@126.com, lisongtian@126.com

## Photocatalytic degradation and trapping experiments

The photocatalytic activities of the as-prepared photocatalysts are measured by degradation of tetracycline (100 mL, 20 mg L<sup>-1</sup>) under visible-light (250 W Xenon lamp covered with a UV filter  $\lambda > 420$  nm) irradiation. Before irradiation start, 0.05 g photocatalyst is suspended in tetracycline solution to reach adsorption/desorption equilibration in dark. During illumination process, 4 mL suspension was withdrawn in 20 min interval. The trapping experiments are the same as photocatalytic experiment, additional add triethanolamine (TEOA, 1 mM), isopropanol (IPA, 1 mM) and benzoquinone (BQ, 1 mM) before the photocatalytic degradation process. The absorbance of tetracycline solution is monitored by UV-vis spectrophotometer. The degradation efficiency of Dr is calculated using  $C_0 - C / C_0$ , here,  $C_0$  and  $C$  are the initial and final concentrations of tetracycline, respectively.

## Photo-electrochemical measurements

The photo-electrochemical performance of the photocatalyst is investigated by the photocurrent response and electrochemical impedance spectroscopy (EIS) on a CHI 852C electrochemical station. Briefly, 0.005 g photocatalyst is dispersed in 1.5 mL ethanol and 1.0 mL ethanol glycol, the dispersion mixture is dipcoated onto FTO substrates (1.0 cm<sup>2</sup>) and used as corresponding working electrodes. A Pt electrode is used as the counter electrode and an Ag/AgCl electrode in saturated KCl solution is employed as the reference electrode.

## FT-IR spectra analysis

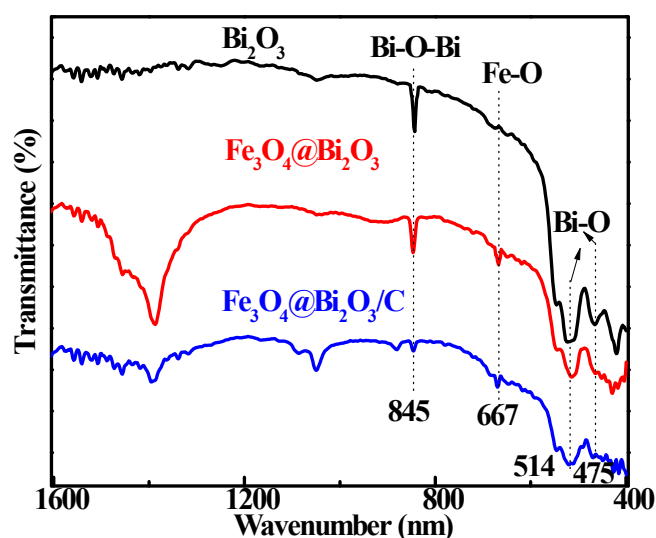

Fig. S1 FT-IR spectra of Bi<sub>2</sub>O<sub>3</sub>, Fe<sub>3</sub>O<sub>4</sub>@Bi<sub>2</sub>O<sub>3</sub>, and Fe<sub>3</sub>O<sub>4</sub>@Bi<sub>2</sub>O<sub>3</sub>/C.
